# Supplementary material
Source: PubMed Central journal article supplement (PMC3414625)
Supplement: supp_111123_productive-akl-2-at.pdf [file supp_111123_productive-akl-2-at.pdf]

**Appendix 2: Studies excluded from the review because they did not report on the effects of the strategies introduced to assess the productivity of faculty in academic medical centres**

| Study                                                                                                                                                   | Types of Productivity                                                                                                                                                                    | Compensation of productivity                                                                                                                                                                                                                                                                            | Notes                                                                                                                                                                                                                                                                  |
|---------------------------------------------------------------------------------------------------------------------------------------------------------|------------------------------------------------------------------------------------------------------------------------------------------------------------------------------------------|---------------------------------------------------------------------------------------------------------------------------------------------------------------------------------------------------------------------------------------------------------------------------------------------------------|------------------------------------------------------------------------------------------------------------------------------------------------------------------------------------------------------------------------------------------------------------------------|
| Albritton 1997 <sup>1</sup><br>• Department of Medicine, Medical College of Georgia, Augusta, GA, USA                                                   | <ul style="list-style-type: none"> <li>• Clinical</li> <li>• Teaching</li> </ul>                                                                                                         | <ul style="list-style-type: none"> <li>• None</li> </ul>                                                                                                                                                                                                                                                | <ul style="list-style-type: none"> <li>• Proves that relative value units (RVU's) can be used to measure faculty clinical but not teaching productivity.</li> <li>• Current Procedural Terminology (CPT4) codes were used to calculate RVUs</li> </ul>                 |
| Alderson 2003 <sup>2</sup><br>• UK Cochrane Centre, NHS R&D Programme, Oxford, UK                                                                       | <ul style="list-style-type: none"> <li>• Research</li> </ul>                                                                                                                             | <ul style="list-style-type: none"> <li>• None</li> </ul>                                                                                                                                                                                                                                                | <ul style="list-style-type: none"> <li>• Displays results of nationwide survey about the faculty skills in 'evidence based medicine'</li> </ul>                                                                                                                        |
| Anema 1992 <sup>3</sup><br>• School of Nursing, Tennessee State University, Nashville, TN, USA                                                          | <ul style="list-style-type: none"> <li>• Research</li> <li>• Teaching</li> <li>• Administrative</li> </ul>                                                                               | <ul style="list-style-type: none"> <li>• Uses a specific weighted formula to calculated the merit increase in pay according to each area of productivity</li> </ul>                                                                                                                                     | <ul style="list-style-type: none"> <li>• Describes a computer based approach to calculate faculty merit increase.</li> <li>• Example of merit increase in table 2</li> </ul>                                                                                           |
| Ashar 2007 <sup>4</sup><br>• Division of General Internal Medicine, Johns Hopkins School of Medicine, Baltimore, Maryland, USA                          | <ul style="list-style-type: none"> <li>• Teaching</li> </ul>                                                                                                                             | <ul style="list-style-type: none"> <li>• Faculty receive 19% salary support per year</li> </ul>                                                                                                                                                                                                         | <ul style="list-style-type: none"> <li>• Evaluation of quality of teaching rather than "productivity"</li> </ul>                                                                                                                                                       |
| Bardes 1995 <sup>5</sup><br>• Department of Medicine, Cornell University, New York, NY, USA                                                             | <ul style="list-style-type: none"> <li>• Teaching</li> </ul>                                                                                                                             | <ul style="list-style-type: none"> <li>• Promotion, tenure, and salary support depending on the RVU scale</li> </ul>                                                                                                                                                                                    | <ul style="list-style-type: none"> <li>• Includes a table detailing the weight of each variable used for calculating relative value units for teaching activities of clinical faculty</li> </ul>                                                                       |
| Bell 1984 <sup>6</sup><br>• Department of Allied Health Sciences, Southwestern Texas University, San Marcus, Texas, USA                                 | <ul style="list-style-type: none"> <li>• Clinical</li> <li>• Research</li> <li>• Teaching</li> <li>• Administrative</li> </ul>                                                           | <ul style="list-style-type: none"> <li>• Faculty assessment to reach administrative decisions about merit, promotion, and tenure</li> </ul>                                                                                                                                                             |                                                                                                                                                                                                                                                                        |
| Bland 1992 <sup>7</sup><br>• Department of Family Practice & Community Health, University of Minnesota Medical School, Minneapolis, MN, USA             | <ul style="list-style-type: none"> <li>• Research</li> </ul>                                                                                                                             | <ul style="list-style-type: none"> <li>• None</li> </ul>                                                                                                                                                                                                                                                | <ul style="list-style-type: none"> <li>• Identifies a consistent set of 12 characteristics that are usually found in research-conducive environments</li> </ul>                                                                                                        |
| Bland 2002 <sup>8</sup><br>• Department of Family Practice and Community Health, University of Minnesota School of Medicine, Minneapolis, Minnesota USA | <ul style="list-style-type: none"> <li>• Clinical</li> <li>• Research</li> <li>• Teaching</li> <li>• Administrative</li> <li>• Other: professional outreach, self-development</li> </ul> | <ul style="list-style-type: none"> <li>• A final merit rating is calculated according to a points assigned for each area of productivity, and this determines the distribution of faculty rewards such as salary raises, bonuses, travel funds, and other, non-monetary types of recognition</li> </ul> | <ul style="list-style-type: none"> <li>• A standard 10-point scale with specific criteria listed to define levels of accomplishment</li> <li>• Table 2 lists example of merit ratings for an individual faculty member evaluated by the Merit-review System</li> </ul> |

| Study                                                                                                                                                                                                               | Types of Productivity                                                                                                  | Compensation of productivity                                                                                                                                                                                   | Notes                                                                                                                                                                                                                                                                                                                                                                                                             |
|---------------------------------------------------------------------------------------------------------------------------------------------------------------------------------------------------------------------|------------------------------------------------------------------------------------------------------------------------|----------------------------------------------------------------------------------------------------------------------------------------------------------------------------------------------------------------|-------------------------------------------------------------------------------------------------------------------------------------------------------------------------------------------------------------------------------------------------------------------------------------------------------------------------------------------------------------------------------------------------------------------|
| Ceriani 1992 <sup>9</sup> <ul style="list-style-type: none"> <li>Department of Neonatology, Harvard Medical School, Boston, Massachusetts, USA</li> </ul>                                                           | <ul style="list-style-type: none"> <li>Clinical</li> <li>Research</li> <li>Teaching</li> <li>Administrative</li> </ul> | <ul style="list-style-type: none"> <li>Total compensation based on 2 components: a base salary determined by basic methods/surveys, and an incentive component that is formula driven</li> </ul>               | <ul style="list-style-type: none"> <li>Uses the Association of Administrators in Academic Pediatrics (AAP) survey to assess level of salaries</li> <li>Table 1 shows example of break-even analysis</li> <li>Table 2 shows time and effort analysis</li> </ul>                                                                                                                                                    |
| Chambers 2003 <sup>10</sup> <ul style="list-style-type: none"> <li>Department of Academic Affairs &amp; Scholarship, School of Dentistry, University of the Pacific in San Francisco, CA, USA</li> </ul>            | <ul style="list-style-type: none"> <li>Clinical</li> <li>Research</li> <li>Teaching</li> <li>Administrative</li> </ul> | <ul style="list-style-type: none"> <li>None</li> </ul>                                                                                                                                                         | <ul style="list-style-type: none"> <li>Describes the development of a system for annual evaluation of faculty</li> </ul>                                                                                                                                                                                                                                                                                          |
| Coleman 2003 <sup>11</sup> <ul style="list-style-type: none"> <li>Department of Veterans Affairs, Yale University School of Medicine, New Haven, Connecticut, USA</li> </ul>                                        | <ul style="list-style-type: none"> <li>Clinical</li> <li>Research</li> <li>Teaching</li> <li>Administrative</li> </ul> | <ul style="list-style-type: none"> <li>None</li> </ul>                                                                                                                                                         |                                                                                                                                                                                                                                                                                                                                                                                                                   |
| Collier 2006 (Part 1 and Part 2) <sup>12,13</sup> <ul style="list-style-type: none"> <li>Department of Management Sciences, Ohio State University, Columbus, OH, USA</li> </ul>                                     | <ul style="list-style-type: none"> <li>Clinical</li> </ul>                                                             | <ul style="list-style-type: none"> <li>Total compensation based on 2 components: a base salary determined by basic methods/surveys, and an incentive component that is formula driven.</li> </ul>              | <ul style="list-style-type: none"> <li>Uses Relative Value Units (RVU's) as an input variable</li> <li>Describes "Data Envelopment Analysis" (DEA) efficiency scores to measure productivity.</li> <li>Table 1 &amp; 2 (in part 2) show "Base Physician Performance Data" and "Typical Physician Performance Ratios"</li> </ul>                                                                                   |
| Crouch 1989 <sup>14</sup> <ul style="list-style-type: none"> <li>Pharmacy Services, The Moses H. Cone Memorial Hospital, Greensboro, NC, USA</li> </ul>                                                             | <ul style="list-style-type: none"> <li>Clinical</li> <li>Research</li> <li>Teaching</li> <li>Administrative</li> </ul> | <ul style="list-style-type: none"> <li>Promotion to pharmacist II, implying substantial raise in salary (10%), greater autonomy and possibility to pursue research and projects of special interest</li> </ul> | <ul style="list-style-type: none"> <li>Point-based system; if 50 points are accumulated over 2 years, promotion to "pharmacist II category" is granted (Point values listed in Appendix of paper)</li> </ul>                                                                                                                                                                                                      |
| Curtright 2000 <sup>15</sup> <ul style="list-style-type: none"> <li>Department of Endocrinology, Metabolism, Nutrition, Mayo Clinic, Rochester, Minnesota, USA</li> </ul>                                           | <ul style="list-style-type: none"> <li>Clinical</li> <li>Research</li> <li>Teaching</li> <li>Administrative</li> </ul> | <ul style="list-style-type: none"> <li>None</li> </ul>                                                                                                                                                         | <ul style="list-style-type: none"> <li>Describes the concept of a "balanced scorecard" or "dashboard report" to assess productivity and monitor how well the organization achieves its performance goals</li> <li>Uses RVU's</li> </ul>                                                                                                                                                                           |
| D'Alessandri 2000 <sup>16</sup> <ul style="list-style-type: none"> <li>Clinical Panel of the Mission based Management Program of the Association of American Medical Colleges (AAMC), Washington DC, USA</li> </ul> | <ul style="list-style-type: none"> <li>Clinical</li> </ul>                                                             | <ul style="list-style-type: none"> <li>States the importance of clinical productivity measures in recognizing and rewarding faculties and departments performance.</li> </ul>                                  | <ul style="list-style-type: none"> <li>Describes a method of calculating standardized clinical full-time equivalents (FTEs) using different clinical metrics:               <ul style="list-style-type: none"> <li>Relative Value Units (RVUs)</li> <li>Total Patient-care Gross Charges</li> <li>Total Net Fee-for-service Revenue</li> <li>Total Volume per CPT Code by Service Category</li> </ul> </li> </ul> |

| Study                                                                                                                                                                                                         | Types of Productivity                                                                                                                                                                                  | Compensation of productivity                                                                                                                                                                                                                                                                                                                                     | Notes                                                                                                                                                                                                                                                                            |
|---------------------------------------------------------------------------------------------------------------------------------------------------------------------------------------------------------------|--------------------------------------------------------------------------------------------------------------------------------------------------------------------------------------------------------|------------------------------------------------------------------------------------------------------------------------------------------------------------------------------------------------------------------------------------------------------------------------------------------------------------------------------------------------------------------|----------------------------------------------------------------------------------------------------------------------------------------------------------------------------------------------------------------------------------------------------------------------------------|
| Dahllof 1999 <sup>17</sup> <ul style="list-style-type: none"> <li>Department of Pediatric Dentistry, Odontological Toxicology, and Surgery, Karolinska Institutet, Stockholm, Sweden</li> </ul>               | <ul style="list-style-type: none"> <li>Clinical:</li> <li>Research (scientific)</li> <li>Teaching (pedagogical)</li> <li>Administrative (Leadership, development, and work-place relations)</li> </ul> | <ul style="list-style-type: none"> <li>Defines the “appointment profile” that is used in new appointments and promotions, guidelines of improving self proficiency, and a basis for determining individual salary rates.</li> </ul>                                                                                                                              | <ul style="list-style-type: none"> <li>Qualification portfolios available online on <a href="http://ki.se/merit.se.html">http://ki.se/merit.se.html</a> .</li> <li>Table 2 lists an example of scoresheet for evaluation of one type of productivity</li> </ul>                  |
| Devos 2003 <sup>18</sup> <ul style="list-style-type: none"> <li>Department of Biostatistics, University Hospital, Lille, France</li> </ul>                                                                    | <ul style="list-style-type: none"> <li>Research</li> </ul>                                                                                                                                             | <ul style="list-style-type: none"> <li>The method describes allows to compare candidate profiles for assignment to research posts</li> </ul>                                                                                                                                                                                                                     | <ul style="list-style-type: none"> <li>Describes a full-Web prototype tool that allows for immediate analysis of publication for a researcher or a research team</li> </ul>                                                                                                      |
| Efferth 2001 <sup>19</sup> <ul style="list-style-type: none"> <li>Virtual Campus Rhineland-Palatinate, Mainz, Germany</li> </ul>                                                                              | <ul style="list-style-type: none"> <li>Clinical</li> <li>Research</li> <li>Teaching</li> <li>Administrative</li> </ul>                                                                                 | <ul style="list-style-type: none"> <li>Promotion of talented young researchers to associate professors</li> </ul>                                                                                                                                                                                                                                                | <ul style="list-style-type: none"> <li>Assesses all types of productivity using quality management panel of instruments.</li> </ul>                                                                                                                                              |
| Holmes 2000 <sup>20</sup> <ul style="list-style-type: none"> <li>Research Panel of the Mission-based Management Program of the Association of American Medical Colleges (AAMC), Washington, DC USA</li> </ul> | <ul style="list-style-type: none"> <li>Research</li> </ul>                                                                                                                                             | <ul style="list-style-type: none"> <li>The measures described help university administrators make decisions about allocating institutional resources to particular researchers</li> </ul>                                                                                                                                                                        | <ul style="list-style-type: none"> <li>Describes general guidelines for the development and use of a metric system to assess contributions to the research mission</li> </ul>                                                                                                    |
| Holcombe 2010 <sup>21</sup> <ul style="list-style-type: none"> <li>Division of Hematology/Oncology, University of California at Irvine, Orange, California, USA</li> </ul>                                    | <ul style="list-style-type: none"> <li>Clinical</li> <li>Research</li> <li>Teaching</li> </ul>                                                                                                         | <ul style="list-style-type: none"> <li>Benchmarks are calculated using the percent effort spent on each mission</li> </ul>                                                                                                                                                                                                                                       | <ul style="list-style-type: none"> <li>Academic and clinical incentives are apportioned on the basis of the percent effort of an individual faculty member for the specific missions. The faculty define and review annually the incentives for possible modification</li> </ul> |
| Howell 2002 <sup>22</sup> <ul style="list-style-type: none"> <li>Department of Pathology, University of California, Davis School of Medicine, Davis, California, USA</li> </ul>                               | <ul style="list-style-type: none"> <li>Clinical</li> <li>Research</li> <li>Teaching</li> <li>Administrative</li> </ul>                                                                                 | <ul style="list-style-type: none"> <li>The summary report card multiplies the “evaluation score” by the “activity score” to achieve a single “quantity/quality product” for each mission. The mission products are then summed to obtain a single “summary score” for each faculty member, which is used in the promotion process and faculty reward.</li> </ul> | <ul style="list-style-type: none"> <li>Describes of a “Web-based mission-based” “self-reporting” (MBR) system</li> </ul>                                                                                                                                                         |
| Joiner 2004 <sup>23</sup> <ul style="list-style-type: none"> <li>Department of Investigative Medicine, Yale University School of Medicine, New Haven, Connecticut USA</li> </ul>                              | <ul style="list-style-type: none"> <li>Clinical</li> <li>Research</li> <li>Teaching</li> <li>Administrative</li> </ul>                                                                                 | <ul style="list-style-type: none"> <li>Comparing 2 types of incentive salary plans</li> </ul>                                                                                                                                                                                                                                                                    | <ul style="list-style-type: none"> <li>Describes 2 incentive plan models: The Expense Model and the No Expense Model</li> </ul>                                                                                                                                                  |

| Study                                                                                                                                                                              | Types of Productivity                                                                                                  | Compensation of productivity                                                                                                                               | Notes                                                                                                                                                                                                                                                                                                                                 |
|------------------------------------------------------------------------------------------------------------------------------------------------------------------------------------|------------------------------------------------------------------------------------------------------------------------|------------------------------------------------------------------------------------------------------------------------------------------------------------|---------------------------------------------------------------------------------------------------------------------------------------------------------------------------------------------------------------------------------------------------------------------------------------------------------------------------------------|
| Jokic 2000 <sup>24</sup> <ul style="list-style-type: none"> <li>National &amp; University Library, University of Zagreb, Zagreb, Croatia of</li> </ul>                             | <ul style="list-style-type: none"> <li>Research</li> </ul>                                                             | <ul style="list-style-type: none"> <li>None</li> </ul>                                                                                                     | <ul style="list-style-type: none"> <li>Documents the scientific productivity of 91 projects in the field of biology that were funded by the Ministry of Science &amp; Technology in Croatia during the 1991-96 period comparing them using the total number of publications and the scientific impact of each publication.</li> </ul> |
| Kaplan 1992 <sup>25</sup> <ul style="list-style-type: none"> <li>Department of Physical Medicine, The Ohio State University, Columbus, Ohio USA</li> </ul>                         | <ul style="list-style-type: none"> <li>Research</li> </ul>                                                             | <ul style="list-style-type: none"> <li>None</li> </ul>                                                                                                     | <ul style="list-style-type: none"> <li>Describes research productivity using number of scientific publications as a measurement instrument in different departments.</li> </ul>                                                                                                                                                       |
| Karras 2006 <sup>26</sup> <ul style="list-style-type: none"> <li>Department of Emergency Medicine, Temple University School of Medicine, Philadelphia, PA USA</li> </ul>           | <ul style="list-style-type: none"> <li>Research</li> </ul>                                                             | <ul style="list-style-type: none"> <li>None</li> </ul>                                                                                                     | <ul style="list-style-type: none"> <li>Describes a survey of research directors that describes the association of research productivity with the characteristics of clinical faculty.</li> </ul>                                                                                                                                      |
| Kearl 1993 <sup>27</sup> <ul style="list-style-type: none"> <li>Department of Family Practice, University of Kentucky College of Medicine, Lexington, Kentucky USA</li> </ul>      | <ul style="list-style-type: none"> <li>Clinical</li> <li>Teaching</li> </ul>                                           | <ul style="list-style-type: none"> <li>None</li> </ul>                                                                                                     | <ul style="list-style-type: none"> <li>Proves that teaching does not have an effect on clinical productivity</li> </ul>                                                                                                                                                                                                               |
| Kratz 2005 <sup>28</sup> <ul style="list-style-type: none"> <li>Department of Anesthesiology, Penn State Milton S. Hershey Medical Center, Hershey, PA, USA</li> </ul>             | <ul style="list-style-type: none"> <li>Clinical</li> <li>Research</li> <li>Teaching</li> <li>Administrative</li> </ul> | <ul style="list-style-type: none"> <li>Annual incentive payment was weighted 60% for clinical activities and 40% for activities in other areas.</li> </ul> | <ul style="list-style-type: none"> <li>Description of adjustment process of Motivation/Incentive/Professional Evaluation Plan (MIPE); 50% goal-based and 50% based on performance standards</li> </ul>                                                                                                                                |
| Krumland 1979 <sup>29</sup> <ul style="list-style-type: none"> <li>Department of Health Management, Baylor College of Medicine, Houston, Texas USA</li> </ul>                      | <ul style="list-style-type: none"> <li>Research</li> </ul>                                                             | <ul style="list-style-type: none"> <li>None</li> </ul>                                                                                                     | <ul style="list-style-type: none"> <li>Assesses research productivity by evaluating the quality of the article as compared to the articles in that journal the article is cited.</li> </ul>                                                                                                                                           |
| McHugh 1994 <sup>30</sup> <ul style="list-style-type: none"> <li>John Hopkins School of Medicine, Baltimore, Maryland, USA</li> </ul>                                              | <ul style="list-style-type: none"> <li>Research</li> <li>Teaching</li> </ul>                                           | <ul style="list-style-type: none"> <li>Describes 3 different pathways for faculty promotion</li> </ul>                                                     | <ul style="list-style-type: none"> <li>This article was a "Letter of Experience" that described the decision-making process of the Professorial Promotion Committee in John Hopkins School of Medicine</li> </ul>                                                                                                                     |
| Osborne 1995 <sup>31</sup> <ul style="list-style-type: none"> <li>Department of Counselor Education, The University of North Carolina at Greensboro, Greensboro, NC USA</li> </ul> | <ul style="list-style-type: none"> <li>Teaching</li> </ul>                                                             | <ul style="list-style-type: none"> <li>None</li> </ul>                                                                                                     | <ul style="list-style-type: none"> <li>Describes a model for faculty peer review focusing on education and teaching</li> </ul>                                                                                                                                                                                                        |

| Study                                                                                                                                                                                            | Types of Productivity                                                                                                  | Compensation of productivity                                                                                                                                                                                                  | Notes                                                                                                                                                                                                                                                                                                          |
|--------------------------------------------------------------------------------------------------------------------------------------------------------------------------------------------------|------------------------------------------------------------------------------------------------------------------------|-------------------------------------------------------------------------------------------------------------------------------------------------------------------------------------------------------------------------------|----------------------------------------------------------------------------------------------------------------------------------------------------------------------------------------------------------------------------------------------------------------------------------------------------------------|
| Schindler 2002 <sup>32</sup> <ul style="list-style-type: none"> <li>Department of Surgery, Northwestern Healthcare &amp; Northwestern University Medical School, Skokie, Illinois USA</li> </ul> | <ul style="list-style-type: none"> <li>Clinical</li> <li>Research</li> <li>Teaching</li> <li>Administrative</li> </ul> | <ul style="list-style-type: none"> <li>Recognition dinner and rewards</li> </ul>                                                                                                                                              | <ul style="list-style-type: none"> <li>Describes a simple system that uses a point scale that assigns each activity or contribution a certain value</li> </ul>                                                                                                                                                 |
| Schwiebert 1988 <sup>33</sup> <ul style="list-style-type: none"> <li>Department of Family Medicine, University of Oklahoma Health Sciences Center, Oklahoma City, Oklahoma, USA</li> </ul>       | <ul style="list-style-type: none"> <li>Mostly Clinical</li> </ul>                                                      | <ul style="list-style-type: none"> <li>Faculty receive a base salary for research &amp; teaching</li> </ul>                                                                                                                   | <ul style="list-style-type: none"> <li>Uses patient care revenue as a funding source</li> <li>Table 1 gives examples of productivity calculator</li> <li>In addition to faculty, discusses other variables to maximize productivity including residents, staff, and practice environment variables.</li> </ul> |
| Taylor 2001 <sup>34</sup> <ul style="list-style-type: none"> <li>Department of Radiology Children's Hospital, Boston, Massachusetts, USA</li> </ul>                                              | <ul style="list-style-type: none"> <li>Clinical</li> <li>Research</li> </ul>                                           | <ul style="list-style-type: none"> <li>None</li> </ul>                                                                                                                                                                        | <ul style="list-style-type: none"> <li>Uses relative value units (RVUs) per full-time equivalents (FTEs) to determine clinical productivity.</li> <li>Concludes that increase in workload negatively affects academic productivity</li> </ul>                                                                  |
| Willis 2004 <sup>35</sup> <ul style="list-style-type: none"> <li>Department of Family Medicine, Indiana University, Indianapolis, IN, USA</li> </ul>                                             | <ul style="list-style-type: none"> <li>Clinical</li> <li>Research</li> <li>Teaching</li> <li>Administrative</li> </ul> | <ul style="list-style-type: none"> <li>Compensation system based on activities in 5 categories (A to E) reflecting different aspects of work activity (partly RVU based) including achievement of department goals</li> </ul> | <ul style="list-style-type: none"> <li>Development of an incentive system that rewards individual and corporate productivity</li> </ul>                                                                                                                                                                        |
| Wright 2010 <sup>36</sup> <ul style="list-style-type: none"> <li>Johns Hopkins University School of Medicine, Baltimore, Maryland, USA</li> </ul>                                                | <ul style="list-style-type: none"> <li>Clinical</li> </ul>                                                             | <ul style="list-style-type: none"> <li>None</li> </ul>                                                                                                                                                                        | <ul style="list-style-type: none"> <li>The researchers report developing a metric to appraise academic physicians with respect to clinical excellence</li> </ul>                                                                                                                                               |

## References

- Albritton TA, Miller MD, Johnson MH, Rahn DW. Using relative value units to measure faculty clinical productivity. *J Gen Intern Med.* Nov 1997;12(11):715-717.
- Alderson P, Gliddon L, Chalmers I. Academic recognition of critical appraisal and systematic reviews in British postgraduate medical education [1]. *Med Educ.* 2003;37(4):386.
- Anema MG, Anema C. Using Lotus software to calculate faculty merit increases. *Comput Nurs.* May-Jun 1992;10(3):105-108.
- Ashar B, Levine R, Magaziner J, Shochet R, Wright S. An association between paying physician-teachers for their teaching efforts and an improved educational experience for learners. *J Gen Intern Med.* Oct 2007;22(10):1393-1397.
- Bardes CL, Hayes JG. Are the teachers teaching? Measuring the educational activities of clinical faculty. *Acad Med.* Feb 1995;70(2):111-114.
- Bell DF, Miller RI, Bell DL. Faculty evaluation: teaching, scholarship, and services. *Nurse Educ.* 1984;9(2):18-27.
- Bland CJ, Ruffin MT. Characteristics of a productive research environment: literature review. *Acad Med.* Jun 1992;67(6):385-397.
- Bland CJ, Wersal L, VanLoy W, Jacott W. Evaluating faculty performance: a systematically designed and assessed approach. *Acad Med.* Jan 2002;77(1):15-30.
- Ceriani PJ. Compensating and providing incentives for academic physicians: balancing earning, clinical, research, teaching, and administrative responsibilities. *Journal of Ambulatory Care Management.* Apr 1992;15(2):69-78.
- Chambers DW, Boyarsky H, Peltier B, Fendler F. Development of a mission-focused faculty evaluation system. *J Dent Educ.* Jan 2003;67(1):10-22.

11. Coleman DL, Moran E, Serfilippi D, et al. Measuring physicians' productivity in a Veterans' Affairs Medical Center. *Acad Med.* Jul 2003;78(7):682-689.
12. Collier DA, Collier CE, Kelly TM. Benchmarking physician performance, Part 1. *J Med Pract Manage.* Jan-Feb 2006;21(4):185-189.
13. Collier DA, Collier CE, Kelly TM. Benchmarking physician performance, part 2.[erratum appears in *J Med Pract Manage.* 2006 May-Jun;21(6):322]. *J Med Pract Manage.* Mar-Apr 2006;21(5):273-279.
14. Crouch JB, Douglas JB, Wheeler DS. Clinical career ladders: the Moses H. Cone Memorial Hospital. *Am J Hosp Pharm.* Nov 1989;46(11):2272-2275.
15. Curtright JW, Stolp-Smith SC, Edell ES. Strategic performance management: development of a performance measurement system at the Mayo Clinic. *Journal of Healthcare Management.* Jan-Feb 2000;45(1):58-68.
16. D'Alessandri RM, Albertsen P, Atkinson BF, et al. Measuring contributions to the clinical mission of medical schools and teaching hospitals. *Academic Medicine.* Dec 2000;75(12):1231-1237.
17. Dahllöf G, Ekstrand J, Nordenström J. Portfolio of qualifications: a tool for evaluating academic productivity at the Karolinska Institutet. *Eur J Dent Educ.* Feb 1999;3(1):31-34.
18. Devos P, Dufresne E, Renard JM, Beuscart R. SIGAPS: a prototype of bibliographic tool for medical research evaluation. *Stud Health Technol Inform.* 2003;95:721-726.
19. Efferth T. Quality management for biomedical research in Germany. *Theory in Biosciences.* 2001;120(1):57-63.
20. Holmes EW, Burks TF, Dzau V, et al. Measuring contributions to the research mission of medical schools. *Acad Med.* Mar 2000;75(3):303-313.
21. Holcombe RF, Hollinger KJ. Mission-focused, productivity-based model for sustainable support of academic hematology/oncology faculty and divisions. *Journal of Oncology Practice.* March 2010;6(2):74-79.
22. Howell LP, Hogarth M, Anders TF. Creating a mission-based reporting system at an academic health center. *Acad Med.* 2002;77(2):130-138.
23. Joiner KA. Using Utility Theory to Optimize a Salary Incentive Plan for Grant-Funded Faculty. *Acad Med.* 2004;79(7):652-660.
24. Jokic M. Scientometric evaluation of the projects in biology funded by the Ministry of Science and Technology, Republic of Croatia, in the 1991-1996 period. *Periodicum Biologorum.* 2000;102(1):129-142.
25. Kaplan P, Mysiw WJ, Pease WS. Academic productivity in physical medicine and rehabilitation. *American Journal of Physical Medicine & Rehabilitation.* Apr 1992;71(2):81-85.
26. Karras DJ, Kruus LK, Baumann BM, et al. Emergency medicine research directors and research programs: characteristics and factors associated with productivity.[erratum appears in *Acad Emerg Med.* 2006 Aug;13(8):911]. *Academic Emergency Medicine.* Jun 2006;13(6):637-644.
27. Kearl GW, Mainous AG, 3rd. Physicians' productivity and teaching responsibilities. *Acad Med.* Feb 1993;68(2):166-167.
28. Kratz RD MB. Finding an incentive plan that actually works. *Physician Exec.* 2005;31(3):54-56.
29. Krumland RB, Will EE, Gorry GA. Scientific publications of a medical school faculty. *J Med Educ.* Nov 1979;54(11):876-884.
30. McHugh PR. A "letter of experience" about faculty promotion in medical schools. *Acad Med.* Nov 1994;69(11):877-881.
31. Osborne W, Purkey WW. A model faculty peer review process for counselor education programs. *Journal of Counseling & Development.* Jul-Aug 1995;73(6):654-658.
32. Schindler N, Winchester DP, Sherman H. Recognizing clinical faculty's contributions in education. *Acad Med.* Sep 2002;77(9):940-941.
33. Schwiebert P, Splinter GL. Enhancing productivity in an academic clinical setting: Challenges and opportunities. *Journal of Ambulatory Care Management.* 1988;11(1):72-81.
34. Taylor GA. Impact of clinical volume on scholarly activity in an academic children's hospital: trends, implications, and possible solutions. *Pediatr Radiol.* Nov 2001;31(11):786-789.
35. Willis DR, Kelton GM, Saywell Jr RM, Kiovsy RD. An Incentive Compensation System That Rewards Individual and Corporate Productivity. *Fam Med.* 2004;36(4):270-278.
36. Wright SM, Kravet S, Christmas C, Burkhart K, Durso SC. Creating an academy of clinical excellence at Johns Hopkins Bayview Medical Center: A 3-year experience. *Academic Medicine.* December 2010;85(12):1833-1839.
